# Supplementary material for: Interlaboratory Coverage Test on Plant Food Bioactive Compounds and Their Metabolites by Mass Spectrometry-Based Untargeted Metabolomics
Source: PubMed Central journal article supplement (PMC6161174; doi:10.3390/metabo8030046), 2018-08-24
Supplement: metabolites-08-00046-s001.pdf [file metabolites-08-00046-s001.pdf]

## Supplementary material

**Supplementary Table 1.** A list of 181 plant bioactives and their metabolites selected as candidates for the multiplatform analysis classified based on their chemical or metabolite class.

### Carotenoids

Lutein  
Lycopene  
Zeaxanthin  
 $\beta$ -Carotene  
 $\beta$ -Cryptoxanthin

### Phytosterols

Brassicasterol  
Campesterol  
Stigmasterol  
 $\beta$ -Sitosterol

### Phenolic acids

2-Hydroxycinnamic acid  
5-Feruloylquinic acid  
Caffeic acid  
Chlorogenic acid  
*p*-Coumaric acid  
Ellagic acid  
Ferulic acid  
Gallic acid  
Homovanillic acid  
Protocatechuic acid  
Rosmarinic acid  
Sinapic acid  
Vanillic acid  
Veratric acid  
Verbascoside

### Flavonoids

(-)-Epicatechin  
(-)-Epigallocatechin 3-*O*-gallate  
8-Prenylnaringenin  
Apigenin  
Apigenin 7-*O*-glucoside  
Cyanidin  
Cyanidin 3-*O*-glucoside  
Cyanidin 3-*O*-rutinoside  
Daidzein  
Delphinidin  
Dihydrogenistein

Diosmetin  
Eriodictyol  
Genistein  
Hesperetin  
Homoeriodictyol  
Homoorientin  
Isoliquiritigenin  
Isoquercitrin  
Isorhamnetin  
Isosakuranetin  
Kaempferol  
Luteolin  
Malvidin 3-*O*-glucoside  
Myricetin  
Naringenin  
Naringin  
Nobiletin  
Phloretin  
Procyanidin A2  
Procyanidin B1  
Procyanidin B2  
Procyanidin B4  
Quercetin  
Silybin  
Sinensetin  
Tangeretin  
Taxifolin  
Vitexin  
Xanthohumol

#### **Other polyphenols**

(+)-lariciresinol  
5-heptadecylresorcinol (AR17:0)  
5-pentacosylresorcinol (AR25:0)  
 $\alpha$ -Tocopherol  
Curcumin  
Hydroxytyrosol  
Resveratrol  
Vanillin

#### **Glucuronides**

3'-Methylcyanidin 3-glucuronide  
4-Hydroxybenzoic acid 4-*O*-glucuronide  
Apigenin 7-glucuronide  
Caffeic acid 3-*O*- $\beta$ -D-glucuronide  
*cis*-Resveratrol 3-*O*- $\beta$ -D-glucuronide  
*cis*-Resveratrol 4'-*O*- $\beta$ -D-glucuronide  
Curcumin 4-*O*- $\beta$ -D-glucuronide

Cyanidin 3-glucuronide  
Daidzein 4'- $\beta$ -D-glucuronide  
Daidzein 7- $\beta$ -D-glucuronide  
Daidzein diglucuronide  
Diosmetin 3'-O- $\beta$ -D-glucuronide  
Epicatechin 3-O-glucuronide  
Genistein 4'- $\beta$ -D-glucuronide  
Genistein 7- $\beta$ -D-glucuronide  
Genistein diglucuronide  
Hesperetin 3'-O- $\beta$ -D-glucuronide  
Hesperetin 7,3'-di-O- $\beta$ -D-glucuronide  
Hesperetin 7-O- $\beta$ -D-glucuronide  
Isorhamnetin 3-O-glucuronide  
Isorhamnetin 4'-O-glucuronide  
Isovanillic acid 3-O-glucuronide  
Kaempferol 3-O- $\beta$ -D-glucuronide  
Luteolin 7-O- $\beta$ -D-glucuronide  
Myricetin 3'-O-glucuronide  
Naringenin 4'-O- $\beta$ -D-glucuronide  
Naringenin 7-O- $\beta$ -D-glucuronide  
Protocatechuic acid 4-O-glucuronide  
Quercetin 3'-O- $\beta$ -D-glucuronide  
Quercetin 5,7-diglucuronide  
Quercetin 7-O- $\beta$ -D-glucuronide  
*trans*-Resveratrol 3-O- $\beta$ -D-glucuronide  
*trans*-Resveratrol 4'-O- $\beta$ -D-glucuronide  
Vanillic acid 4-O-glucuronide

#### **Sulfates**

1-Methylpyrogallol 3-O-sulfate  
2-Methylpyrogallol 1-O-sulfate  
3,4-Dihydroxybenzoic acid 3-O-sulfate  
3,4-Dihydroxybenzoic acid 4-O-sulfate  
3'-O-Methyl(-)-epicatechin 5-O-sulfate  
3'-O-Methyl(-)-epicatechin 7-O-sulfate  
4-Hydroxybenzoic acid 4-O-sulfate  
4-Methylcatechol 1-O-sulfate  
4-Methylcatechol 2-O-sulfate  
4-O-Methylgallic acid 3-O-sulfate  
Benzoic acid sulfate  
Caffeic acid 3-O-sulfate  
Caffeic acid 4-O-sulfate  
Catechol O-sulfate  
Daidzein 4' sulfate  
Epicatechin 3-O-sulfate  
Genistein 7-sulfate  
Isoferulic acid 3-O-sulfate

Isoquercitrin 4'-*O*-sulfate  
Isorhamnetin 3-*O*-sulfate  
Isovanillic acid 3-*O*-sulfate  
Kaempferol 3-*O*-sulfate  
Myricetin 3'-*O*-sulfate  
Protocatechuic acid 3-*O*-sulfate  
Protocatechuic acid 4-*O*-sulfate  
Pyrogallol 2-*O*-sulfate  
Quercetin 3'-*O*-sulfate  
Quercetin 4'-*O*-sulfate  
Quercetin disulfate  
Silybin 20-*O*-sulfate  
Silybin 7,20-di-*O*-sulfate  
Taxifolin 4'-*O*-sulfate  
Vanillic acid 4-*O*-sulfate

#### **Sulfates and glucuronides**

3'-Methylcyanidin 3-glucuronide-5-glucoside-4'-sulfate  
Daidzein 7- $\beta$ -D-glucuronide 4'-Sulfate  
Genistein 7-sulfate 4'- $\beta$ -D-glucuronide  
Genistein 7- $\beta$ -D-glucuronide 4'-sulfate

#### **Microbial metabolites**

3,4-Dihydroxybenzoic acid  
3,4-Dihydroxyphenylacetic acid  
3,4-Dihydroxyphenylpropionic acid  
3,4-Dimethoxybenzoic acid  
3-Hydroxybenzoic acid  
3-Hydroxyphenylacetic acid  
3-Hydroxyphenylpropionic acid  
3-Phenylpropionic acid  
4-Coumaric acid  
4-Hydroxybenzoic acid  
4-Hydroxyphenylacetic acid  
4-Hydroxyphenylpropionic acid  
4-Methylcatechol  
Benzoic acid  
Dihydrocaffeic acid  
Dihydrodaidzein  
Enterodiol  
Enterolactone  
Equol  
Equol 4'-sulfate  
Equol 7- $\beta$ -D-glucuronide  
Hippuric acid  
*O*-Desmethylangolensin  
Protocatechuic acid

Urolithin A

Urolithin A 3-glucuronide

Urolithin A 8-glucuronide

Urolithin B

Urolithin B 3-*O*-glucuronide

Urolithin C

Urolithin D

**Other compounds**

Bergaptol

Cafestol

*myo*-Inositol

Stachydrine

Theobromine

Trigonelline

Ursolic acid

**Supplementary Table 2.** Chemical standards analysed in the multiplatform test. Concentration in the stock solution other than 10 mM: \* 5 mM, † 1 mM, ‡ 0.5 mM, § 50 ppm

| Compound                           | PhytoHub ID | Class                | Formula                                        | M <sub>0</sub> [Da] | log <i>P</i> (calc.) | Supplier       | Mix | Structure                                                                             |
|------------------------------------|-------------|----------------------|------------------------------------------------|---------------------|----------------------|----------------|-----|---------------------------------------------------------------------------------------|
| trigonelline                       | PHUB001378  | betaine              | C <sub>7</sub> H <sub>7</sub> NO <sub>2</sub>  | 137.0477            | -3.30                | Extrasynthese  | A   | 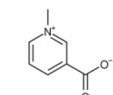   |
| stachydrine (proline betaine)      | PHUB000844  | betaine              | C <sub>7</sub> H <sub>13</sub> NO <sub>2</sub> | 143.0946            | -2.24                | Extrasynthese  | A   |    |
| 4-hydroxyphenylacetic acid         | PHUB000543  | microbial metabolite | C <sub>8</sub> H <sub>8</sub> O <sub>3</sub>   | 152.0473            | 0.93                 | Aldrich        | A   |    |
| vanillin                           | PHUB000645  | other phenolic       | C <sub>8</sub> H <sub>8</sub> O <sub>3</sub>   | 152.0473            | 1.31                 | Sigma-Aldrich  | A   |    |
| protocatechuic acid                | PHUB000310  | phenolic acid        | C <sub>7</sub> H <sub>6</sub> O <sub>4</sub>   | 154.0266            | 1.32                 | Sigma          | A   |    |
| hydroxytyrosol                     | PHUB001321  | other phenolic       | C <sub>8</sub> H <sub>10</sub> O <sub>3</sub>  | 154.0630            | 0.13                 | Extrasynthese  | B   |    |
| <i>p</i> -coumaric acid            | PHUB000590  | phenolic acid        | C <sub>9</sub> H <sub>8</sub> O <sub>3</sub>   | 164.0473            | 1.74                 | Sigma          | A   |   |
| 3-(4-hydroxyphenyl)-propionic acid | PHUB001072  | microbial metabolite | C <sub>9</sub> H <sub>10</sub> O <sub>3</sub>  | 166.0630            | 1.15                 | Fluka          | A   |  |
| vanillic acid                      | PHUB000316  | phenolic acid        | C <sub>8</sub> H <sub>8</sub> O <sub>4</sub>   | 168.0423            | 1.70                 | Sigma          | A   |  |
| gallic acid                        | PHUB000303  | phenolic acid        | C <sub>7</sub> H <sub>6</sub> O <sub>5</sub>   | 170.0215            | 1.17                 | Sigma (G73849) | A   |  |

|                        |            |                      |                                                             |          |       |                             |                |                                                                                       |
|------------------------|------------|----------------------|-------------------------------------------------------------|----------|-------|-----------------------------|----------------|---------------------------------------------------------------------------------------|
| hippuric acid          | PHUB001174 | phenolic acid        | C <sub>9</sub> H <sub>9</sub> NO <sub>3</sub>               | 179.0582 | 0.23  | Sigma (112003)              | A              | 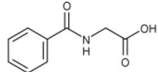   |
| caffeic acid           | PHUB000574 | phenolic acid        | C <sub>9</sub> H <sub>8</sub> O <sub>4</sub>                | 180.0423 | 1.67  | Sigma (C0625)               | A              |    |
| myo-inositol           | PHUB001870 | sugar alcohol        | C <sub>6</sub> H <sub>12</sub> O <sub>6</sub>               | 180.0634 | -2.59 | Merck                       | A              |    |
| theobromine            | PHUB000790 | alkaloid             | C <sub>7</sub> H <sub>8</sub> N <sub>4</sub> O <sub>2</sub> | 180.0650 | -0.46 | Extrasynthese               | A              |    |
| dihydrocaffeic acid    | PHUB000604 | microbial metabolite | C <sub>9</sub> H <sub>10</sub> O <sub>4</sub>               | 182.0579 | 1.04  | Sigma                       | A              |    |
| homovanillic acid      | PHUB000617 | phenolic acid        | C <sub>9</sub> H <sub>10</sub> O <sub>4</sub>               | 182.0579 | 1.02  | Extrasynthese               | B              |    |
| veratric acid          | PHUB001218 | phenolic acid        | C <sub>9</sub> H <sub>10</sub> O <sub>4</sub>               | 182.0579 | 1.52  | Aldrich                     | A              |    |
| catechol O-sulfate     | PHUB001352 | sulfate              | C <sub>6</sub> H <sub>6</sub> O <sub>5</sub> S              | 189.9936 | -0.81 | <i>synthesised in-house</i> | B <sup>†</sup> |   |
| ferulic acid           | PHUB000608 | phenolic acid        | C <sub>10</sub> H <sub>10</sub> O <sub>4</sub>              | 194.0579 | 1.58  | Aldrich (128708)            | A              |  |
| bergaptol              | PHUB000259 | other phenolic       | C <sub>11</sub> H <sub>6</sub> O <sub>4</sub>               | 202.0270 | 1.86  | Extrasynthese               | B*             |  |
| pyrogallol 2-O-sulfate | PHUB001416 | sulfate              | C <sub>6</sub> H <sub>6</sub> O <sub>6</sub> S              | 205.9885 | -0.66 | <i>synthesised in-house</i> | A              |  |

|                                   |            |                      |                                                             |          |       |                             |                |                                                                                       |
|-----------------------------------|------------|----------------------|-------------------------------------------------------------|----------|-------|-----------------------------|----------------|---------------------------------------------------------------------------------------|
| uro lithin B                      | PHUB001394 | microbial metabolite | C <sub>13</sub> H <sub>8</sub> O <sub>3</sub>               | 212.0473 | 2.65  | Villapharma Research S.L.   | B              | 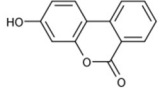   |
| sinapic acid                      | PHUB000638 | phenolic acid        | C <sub>11</sub> H <sub>12</sub> O <sub>5</sub>              | 224.0685 | 1.63  | Sigma                       | A <sup>†</sup> |    |
| uro lithin A                      | PHUB001391 | microbial metabolite | C <sub>13</sub> H <sub>8</sub> O <sub>4</sub>               | 228.0423 | 2.16  | Villapharma Research S.L.   | B              |    |
| resveratrol                       | PHUB000324 | other phenolic       | C <sub>14</sub> H <sub>12</sub> O <sub>3</sub>              | 228.0786 | 2.57  | Sigma                       | A              |    |
| 4-O-methylgallic acid 3-O-sulfate | PHUB001873 | sulfate              | C <sub>8</sub> H <sub>8</sub> O <sub>8</sub> S              | 263.9940 | -0.53 | <i>synthesised in-house</i> | A              |    |
| genistein                         | PHUB000225 | flavonoid            | C <sub>15</sub> H <sub>10</sub> O <sub>5</sub>              | 270.0528 | 3.04  | Extrasynthese               | B              |    |
| phloretin                         | PHUB001344 | other phenolic       | C <sub>15</sub> H <sub>14</sub> O <sub>5</sub>              | 274.0841 | 2.23  | Extrasynthese               | B              |    |
| kaempferol                        | PHUB000672 | flavonoid            | C <sub>15</sub> H <sub>10</sub> O <sub>6</sub>              | 286.0477 | 1.99  | Extrasynthese               | B              |   |
| luteolin                          | PHUB000892 | flavonoid            | C <sub>15</sub> H <sub>10</sub> O <sub>6</sub>              | 286.0477 | 2.73  | Fluka                       | B*             |  |
| cyanidin                          | PHUB000483 | flavonoid            | C <sub>15</sub> H <sub>11</sub> O <sub>6</sub> <sup>+</sup> | 287.0556 | 2.41  | n/a                         | B              |  |



|                                 |            |                 |                                                |          |      |                 |                |                                                                                       |
|---------------------------------|------------|-----------------|------------------------------------------------|----------|------|-----------------|----------------|---------------------------------------------------------------------------------------|
| (-)-epicatechin                 | PHUB000262 | flavonoid       | C <sub>15</sub> H <sub>14</sub> O <sub>6</sub> | 290.0790 | 1.02 | Sigma           | B              | 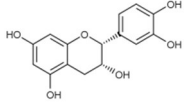   |
| ellagic acid                    | PHUB000298 | phenolic acid   | C <sub>14</sub> H <sub>6</sub> O <sub>8</sub>  | 302.0063 | 1.59 | Sigma           | A <sup>§</sup> |    |
| hesperetin                      | PHUB000380 | flavonoid       | C <sub>16</sub> H <sub>14</sub> O <sub>6</sub> | 302.0790 | 2.52 | Sigma           | A              |    |
| isorhamnetin                    | PHUB000662 | flavonoid       | C <sub>16</sub> H <sub>12</sub> O <sub>7</sub> | 316.0583 | 1.96 | Extrasynthese   | B <sup>‡</sup> |    |
| cafestol                        | PHUB000006 | terpenoid       | C <sub>20</sub> H <sub>28</sub> O <sub>3</sub> | 316.2038 | 3.04 | MP Biomedicals  | A              |    |
| 5-heptadecylresorcinol (AR17:0) | PHUB000554 | alkylresorcinol | C <sub>23</sub> H <sub>40</sub> O <sub>2</sub> | 348.3028 | 8.79 | ReseaChem       | B              |    |
| chlorogenic acid                | PHUB000585 | phenolic acid   | C <sub>16</sub> H <sub>18</sub> O <sub>9</sub> | 354.0950 | 0.17 | Aldrich (C3878) | A              |   |
| rosmarinic acid                 | PHUB000634 | phenolic acid   | C <sub>18</sub> H <sub>16</sub> O <sub>8</sub> | 360.0845 | 2.57 | Extrasynthese   | A              |  |
| (+)-lariciresinol               | PHUB001390 | lignan          | C <sub>20</sub> H <sub>24</sub> O <sub>6</sub> | 360.1573 | 2.16 | ArboNova        | A              |  |
| curcumin                        | PHUB001408 | other phenolic  | C <sub>21</sub> H <sub>20</sub> O <sub>6</sub> | 368.1260 | 3.62 | Sigma           | B*             |  |

|                                 |            |                 |                                                              |          |      |                                           |                |                                                                                       |
|---------------------------------|------------|-----------------|--------------------------------------------------------------|----------|------|-------------------------------------------|----------------|---------------------------------------------------------------------------------------|
| tangeretin                      | PHUB000907 | flavonoid       | C <sub>20</sub> H <sub>20</sub> O <sub>7</sub>               | 372.1210 | 2.88 | Extrasynthese                             | B              | 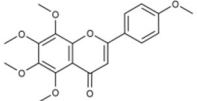   |
| quercetin 3'-O-sulfate          | PHUB001316 | sulfate         | C <sub>15</sub> H <sub>10</sub> O <sub>10</sub> S            | 381.9995 | 0.65 | <i>synthesised in-house</i> <sup>29</sup> | A <sup>†</sup> |    |
| quercetin 4'-O-sulfate          | PHUB001871 | sulfate         | C <sub>15</sub> H <sub>10</sub> O <sub>10</sub> S            | 381.9995 | 0.70 | <i>synthesised in-house</i> <sup>29</sup> | A <sup>†</sup> |    |
| β-sitosterol                    | PHUB000479 | steroid         | C <sub>29</sub> H <sub>50</sub> O                            | 414.3862 | 7.27 | Sigma                                     | C              |    |
| α-tocopherol                    | PHUB001872 | other phenolic  | C <sub>29</sub> H <sub>50</sub> O <sub>2</sub>               | 430.3811 | 8.84 | Sigma                                     | A              |    |
| apigenin 7-O-glucoside          | PHUB000865 | flavonoid       | C <sub>21</sub> H <sub>20</sub> O <sub>10</sub>              | 432.1056 | 0.68 | HWI Analytik                              | B*             |    |
| cyanidin 3-O-glucoside          | PHUB000503 | flavonoid       | C <sub>21</sub> H <sub>21</sub> O <sub>11</sub> <sup>+</sup> | 448.1006 | 0.98 | Extrasynthese                             | B              |   |
| ursolic acid                    | PHUB000190 | terpenoid       | C <sub>30</sub> H <sub>48</sub> O <sub>3</sub>               | 456.3603 | 6.35 | Aldrich                                   | A              |  |
| 5-pentacosylresorcinol (AR25:0) | PHUB000560 | alkylresorcinol | C <sub>31</sub> H <sub>56</sub> O <sub>2</sub>               | 460.4280 | 10.4 | ReseaChem                                 | B*             |  |

|                          |            |               |                         |          |       |                                                                |                |                                                                                      |
|--------------------------|------------|---------------|-------------------------|----------|-------|----------------------------------------------------------------|----------------|--------------------------------------------------------------------------------------|
| quercetin disulfate      | PHUB001874 | sulfate       | $C_{15}H_{10}O_{13}S_2$ | 461.9563 | -0.34 | <i>a mixture of isomers synthesised in-house</i> <sup>29</sup> | B <sup>‡</sup> | 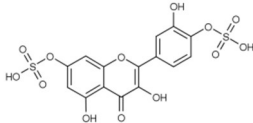  |
| kaempferol 3-glucuronide | PHUB001318 | glucuronide   | $C_{21}H_{18}O_{12}$    | 462.0798 | 1.40  | Extrasynthese                                                  | A              |   |
| $\beta$ -carotene        | PHUB000350 | terpenoid     | $C_{40}H_{56}$          | 536.4382 | 9.72  | Extrasynthese                                                  | C              |   |
| procyanidin A2           | PHUB000275 | flavonoid     | $C_{30}H_{24}O_{12}$    | 576.1268 | 2.43  | Extrasynthese                                                  | A              |   |
| naringin                 | PHUB000389 | flavonoid     | $C_{27}H_{32}O_{14}$    | 580.1792 | -0.24 | Sigma                                                          | A              |   |
| verbascoside             | PHUB000646 | phenolic acid | $C_{29}H_{36}O_{15}$    | 624.2054 | 1.09  | Extrasynthese                                                  | A              |  |

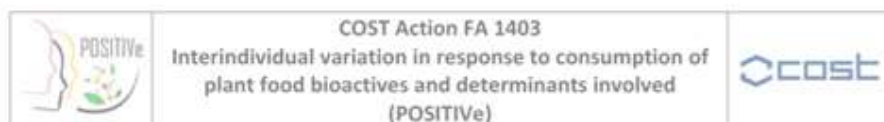

## Contents

|                                                                                                             |    |
|-------------------------------------------------------------------------------------------------------------|----|
| <b>1. AIM</b> .....                                                                                         | 3  |
| <b>2. DOCUMENTS GENERATED BY THIS SOP</b> .....                                                             | 3  |
| <b>3. PROCEDURE</b> .....                                                                                   | 4  |
| <b>3.1. Preparation of stock solutions</b> .....                                                            | 4  |
| 3.1.1. Compounds to include in the coverage test .....                                                      | 4  |
| 3.1.2. Collection of compounds to include in the ring test .....                                            | 4  |
| 3.1.3. Preparation of the individual standard stock solutions at 10mM .....                                 | 4  |
| 3.1.4. Preparation of the standard mix solution at 200µM (S1) .....                                         | 4  |
| 3.1.5. Preparation of the standard stock solution at 10 µM (S2 and U2) .....                                | 5  |
| <b>3.2. Analysis of standard solutions S2 and U2</b> .....                                                  | 5  |
| <b>3.3. Treatment of results</b> .....                                                                      | 6  |
| <b>Annex 1. List of Analytical platforms involved and contact persons</b> .....                             | 7  |
| <b>Annex 2. List of compounds, formula, monoisotopic mass (MM), log P, origin, purity, solubility</b> ..... | 8  |
| <b>Annex 3. Characteristics of the MS equipment and conditions of analysis</b> .....                        | 9  |
| <b>Annex 4. Characteristics of the GC-MS equipment and conditions of analysis</b> .....                     | 12 |
| <b>Annex 5. Characteristics of the NMR equipment and conditions of analysis</b> .....                       | 13 |
| <b>Annex 6. Template to provide results from each platform</b> .....                                        | 14 |

**Supplementary Figure 1.** The contents of the standard operating procedure (SOP) sent to each participating platform.
